# Supplementary material for: Determining the diffusion mechanism for high aspect ratio ZnO nanowires electrodeposited into anodic aluminum oxide
Source: Royal Society of Chemistry journal article supplement (doi:10.1039/c6tc04921d), 2017-01-01
Supplement: c6tc04921d1.pdf [file c6tc04921d1.pdf]

## Supporting information

### Determining the Diffusion Mechanism for High Aspect-ratio ZnO

#### Nanowires Electrodeposited into Anodic Aluminum Oxide

*Cristina V. Manzano<sup>1,\*</sup>, Laszlo Pethö<sup>1</sup>, Johann Michler<sup>1</sup>, Laetitia Philippe<sup>1</sup>.*

<sup>1</sup> *Empa, Swiss Federal Laboratories for Materials Science and Technology, Laboratory for Mechanics of Materials and Nanostructures, Feuerwerkerstrasse 39, CH-3602 Thun, Switzerland*

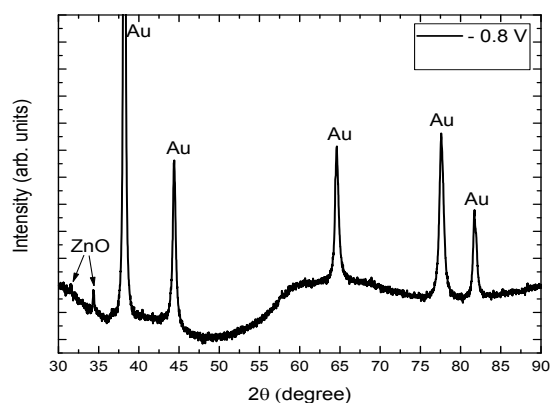

Fig. S1. XRD pattern of ZnO nanowires from  $2\theta = 30^\circ$  to  $90^\circ$ .
